# Supplementary material for: Equivalent Indels – Ambiguous Functional Classes and Redundancy in Databases
Source: PubMed Central journal article supplement (PMC3642179; doi:10.1371/journal.pone.0062803), 2013-05-02
Supplement: pone.0062803.s001.pdf [file pone.0062803.s001.pdf]

**Table S1.** The table presents the number of indels of a specific equivalence factor. The equivalence factor indicates the number of equivalent variations for each variation. This means, an indel of equivalence factor  $n$  has  $n$  further equivalent entries in the database. An equivalence factor of 0 means that there exists no equivalent entry.

| equivalence factor | Deletions      |                    | Insertions      |                    |
|--------------------|----------------|--------------------|-----------------|--------------------|
|                    | #all deletions | #ambiguity classes | #all insertions | #ambiguity classes |
| 0                  | 2 289 454      | 2 289 454          | 2 525 364       | 2 525 364          |
| 1                  | 303 078        | 151 539            | 597 354         | 298 677            |
| 2                  | 57 105         | 19 035             | 52 923          | 17 641             |
| 3                  | 20 540         | 5 135              | 5 996           | 1 499              |
| 4                  | 5 040          | 1 008              | 1 255           | 251                |
| 5                  | 1 374          | 229                | 348             | 58                 |
| 6                  | 189            | 27                 | 189             | 27                 |
| 7                  | 56             | 7                  | 48              | 6                  |
| 8                  | 36             | 4                  | 18              | 2                  |
| 9                  | 10             | 1                  | 20              | 2                  |
| 10                 | 0              | 0                  | 11              | 1                  |
