# Supplementary material for: Equivalent Indels – Ambiguous Functional Classes and Redundancy in Databases
Source: PubMed Central journal article supplement (PMC3642179; doi:10.1371/journal.pone.0062803), 2013-05-02
Supplement: pone.0062803.s002.pdf [file pone.0062803.s002.pdf]

**Table S2.** The table presents the number of indels of a specific length. In the column *#all ambiguous* the number of all ambiguous indels of this length are written. The column *#ambiguity classes* indicates, how many indels have the specific length if two equivalent variations are put together in one class.

| length [bp] | Deletions      |                    | Insertions     |                    |
|-------------|----------------|--------------------|----------------|--------------------|
|             | #all ambiguous | #ambiguity classes | #all ambiguous | #ambiguity classes |
| 1           | 33 682         | 15 521             | 331 313        | 161 809            |
| 2           | 72 718         | 36 081             | 120 913        | 57 102             |
| 3           | 34 127         | 16 269             | 49 095         | 23 479             |
| 4           | 103 408        | 46 059             | 83 279         | 40 047             |
| 5           | 19 066         | 8 882              | 23 185         | 11 207             |
| 6           | 36 090         | 14 266             | 14 598         | 7 043              |
| 7           | 4 386          | 2 056              | 4 526          | 2 192              |
| 8           | 32 010         | 12 801             | 9 725          | 4 679              |
| 9           | 5 214          | 2 257              | 3 403          | 1 659              |
| 10          | 10 722         | 5 114              | 3 845          | 1 852              |
| 11          | 2 065          | 1 017              | 1 455          | 723                |
| 12          | 6 010          | 2 933              | 2 729          | 1 346              |
| 13          | 1 436          | 711                | 1 103          | 550                |
| 14          | 3 300          | 1 631              | 1 072          | 533                |
| 15          | 1 669          | 825                | 905            | 451                |
| 16          | 3 538          | 1 756              | 1 068          | 533                |
| 17          | 829            | 411                | 690            | 343                |
| 18          | 2 361          | 1 171              | 632            | 315                |
| 19          | 678            | 338                | 522            | 260                |
| 20          | 2 201          | 1 087              | 546            | 272                |
| 21          | 592            | 294                | 352            | 175                |
| 22          | 1 221          | 607                | 295            | 147                |
| 23          | 480            | 236                | 233            | 116                |
| 24          | 1 356          | 668                | 392            | 193                |
| 25          | 388            | 192                | 200            | 100                |
| 26          | 884            | 436                | 191            | 95                 |
| 27          | 341            | 170                | 163            | 81                 |
| 28          | 715            | 353                | 186            | 93                 |
| 29          | 231            | 114                | 106            | 53                 |
| 30          | 592            | 292                | 122            | 61                 |
| 31          | 177            | 88                 | 109            | 54                 |
| 32          | 427            | 211                | 94             | 47                 |
| 33          | 108            | 53                 | 74             | 37                 |
| 34          | 287            | 142                | 88             | 44                 |
| 35          | 93             | 46                 | 51             | 25                 |
| 36          | 143            | 71                 | 136            | 68                 |
| 37          | 40             | 20                 | 107            | 53                 |
| 38          | 100            | 50                 | 101            | 50                 |
| 39          | 28             | 14                 | 74             | 37                 |
| 40          | 65             | 32                 | 121            | 59                 |
| 41          | 34             | 17                 | 64             | 32                 |
| 42          | 48             | 24                 | 79             | 39                 |
| 43          | 26             | 13                 | 32             | 16                 |
| 44          | 36             | 18                 | 68             | 34                 |
| 45          | 24             | 12                 | 44             | 22                 |
| 46          | 29             | 13                 | 10             | 5                  |
| 47          | 22             | 10                 | 14             | 7                  |
| 48          | 55             | 24                 | 16             | 8                  |
| 49          | 8              | 4                  | 0              | 0                  |
| 50          | 26             | 11                 | 6              | 3                  |

| length [bp] | Deletions      |                    | Insertions     |                    |
|-------------|----------------|--------------------|----------------|--------------------|
|             | #all ambiguous | #ambiguity classes | #all ambiguous | #ambiguity classes |
| 51          | 14             | 6                  | 8              | 4                  |
| 52          | 48             | 19                 | 2              | 1                  |
| 53          | 21             | 10                 | 4              | 2                  |
| 54          | 55             | 24                 | 0              | 0                  |
| 55          | 47             | 20                 | 0              | 0                  |
| 56          | 45             | 20                 | 0              | 0                  |
| 57          | 27             | 12                 | 0              | 0                  |
| 58          | 27             | 12                 | 2              | 1                  |
| 59          | 21             | 10                 | 0              | 0                  |
| 60          | 44             | 17                 | 0              | 0                  |
| 61          | 41             | 18                 | 0              | 0                  |
| 62          | 16             | 7                  | 0              | 0                  |
| 63          | 29             | 13                 | 0              | 0                  |
| 64          | 52             | 22                 | 0              | 0                  |
| 65          | 33             | 15                 | 2              | 1                  |
| 66          | 39             | 17                 | 2              | 1                  |
| 67          | 24             | 11                 | 0              | 0                  |
| 68          | 32             | 14                 | 0              | 0                  |
| 69          | 27             | 12                 | 0              | 0                  |
| 70          | 33             | 14                 | 2              | 1                  |
| 71          | 15             | 7                  | 0              | 0                  |
| 72          | 25             | 12                 | 0              | 0                  |
| 73          | 15             | 7                  | 2              | 1                  |
| 74          | 26             | 11                 | 0              | 0                  |
| 75          | 21             | 10                 | 2              | 1                  |
| 76          | 24             | 10                 | 0              | 0                  |
| 77          | 23             | 9                  | 0              | 0                  |
| 78          | 22             | 10                 | 2              | 1                  |
| 79          | 30             | 13                 | 2              | 1                  |
| 80          | 12             | 6                  | 0              | 0                  |
| 81          | 7              | 3                  | 0              | 0                  |
| 82          | 24             | 11                 | 0              | 0                  |
| 83          | 5              | 2                  | 0              | 0                  |
| 84          | 27             | 13                 | 0              | 0                  |
| 85          | 11             | 5                  | 0              | 0                  |
| 86          | 19             | 7                  | 0              | 0                  |
| 87          | 11             | 4                  | 0              | 0                  |
| 88          | 11             | 5                  | 0              | 0                  |
| 89          | 10             | 5                  | 0              | 0                  |
| 90          | 33             | 15                 | 0              | 0                  |
| 91          | 11             | 5                  | 0              | 0                  |
| 92          | 17             | 7                  | 0              | 0                  |
| 93          | 21             | 10                 | 0              | 0                  |
| 94          | 8              | 4                  | 0              | 0                  |
| 95          | 20             | 8                  | 0              | 0                  |
| 96          | 20             | 9                  | 0              | 0                  |
| 97          | 9              | 4                  | 0              | 0                  |
| 98          | 9              | 4                  | 0              | 0                  |
| 99          | 5              | 2                  | 0              | 0                  |
| 100         | 16             | 6                  | 0              | 0                  |
